# Supplementary material for: Combined topical and systemic administration with human adipose-derived mesenchymal stem cells (hADSC) and hADSC-derived exosomes markedly promoted cutaneous wound healing and regeneration
Source: PubMed Central journal article supplement (PMC8088044; doi:10.1186/s13287-021-02287-9), 2021-05-01

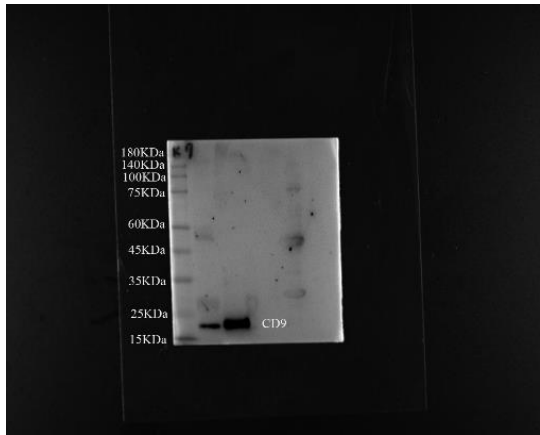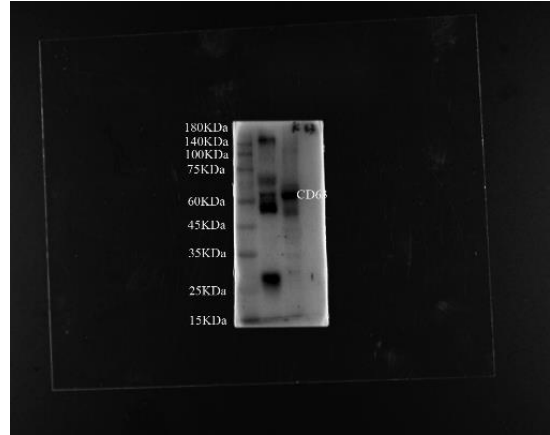

Supplement: 13287_2021_2287_MOESM1_ESM.pdf [file 13287_2021_2287_MOESM1_ESM.pdf]
